# Supplementary material for: The Impact of Psychological Distress on the Occupational Well-Being of Sexual and Gender Minorities
Source: MDPI journal article supplement (doi:10.3390/healthcare10040699), 2022-04-08
Supplement: s1 [file s1]

Table S1 – Multiple Comparisons Tukey HSD

| Variable                     | (I) Sexual Orientation | (J) Sexual Orientation | Mean Difference (I-J) | Standard Error | Sig.  |
|------------------------------|------------------------|------------------------|-----------------------|----------------|-------|
| Depression Symptoms          | Asexual                | Bisexual               | 1.40476               | 0.64021        | 0.129 |
|                              |                        | Gay or Lesbian         | 1.89773*              | 0.63955        | 0.018 |
|                              |                        | Pansexual              | 1.87500               | 0.76607        | 0.072 |
|                              | Bisexual               | Asexual                | -1.40476              | 0.64021        | 0.129 |
|                              |                        | Gay or Lesbian         | 0.49297               | 0.19082        | 0.051 |
|                              |                        | Pansexual              | 0.47024               | 0.46287        | 0.740 |
|                              | Gay or Lesbian         | Asexual                | -1.89773*             | 0.63955        | 0.018 |
|                              |                        | Bisexual               | -0.49297              | 0.19082        | 0.051 |
|                              |                        | Pansexual              | -0.02273              | 0.46196        | 1.000 |
|                              | Pansexual              | Asexual                | -1.87500              | 0.76607        | 0.072 |
|                              |                        | Bisexual               | -0.47024              | 0.46287        | 0.740 |
|                              |                        | Gay or Lesbian         | 0.02273               | 0.46196        | 1.000 |
| Anxiety Symptoms             | Asexual                | Bisexual               | 1.63855*              | 0.54413        | 0.016 |
|                              |                        | Gay or Lesbian         | 1.81818*              | 0.54342        | 0.005 |
|                              |                        | Pansexual              | 3.00000*              | 0.65092        | 0.000 |
|                              | Bisexual               | Asexual                | -1.63855*             | 0.54413        | 0.016 |
|                              |                        | Gay or Lesbian         | 0.17963               | 0.16264        | 0.687 |
|                              |                        | Pansexual              | 1.36145*              | 0.39351        | 0.004 |
|                              | Gay or Lesbian         | Asexual                | -1.81818*             | 0.54342        | 0.005 |
|                              |                        | Bisexual               | -0.17963              | 0.16264        | 0.687 |
|                              |                        | Pansexual              | 1.18182*              | 0.39252        | 0.016 |
|                              | Pansexual              | Asexual                | -3.00000*             | 0.65092        | 0.000 |
|                              |                        | Bisexual               | -1.36145*             | 0.39351        | 0.004 |
|                              |                        | Gay or Lesbian         | -1.18182*             | 0.39252        | 0.016 |
| Burnout                      | Asexual                | Bisexual               | 0.58031               | 0.35405        | 0.359 |
|                              |                        | Gay or Lesbian         | 0.71955               | 0.35363        | 0.179 |
|                              |                        | Pansexual              | 0.86364               | 0.42409        | 0.178 |
|                              | Bisexual               | Asexual                | -0.58031              | 0.35405        | 0.359 |
|                              |                        | Gay or Lesbian         | 0.13925               | 0.10299        | 0.531 |
|                              |                        | Pansexual              | 0.28333               | 0.25573        | 0.685 |
|                              | Gay or Lesbian         | Asexual                | -0.71955              | 0.35363        | 0.179 |
|                              |                        | Bisexual               | -0.13925              | 0.10299        | 0.531 |
|                              |                        | Pansexual              | 0.14408               | 0.25516        | 0.942 |
|                              | Pansexual              | Asexual                | -0.86364              | 0.42409        | 0.178 |
|                              |                        | Bisexual               | -0.28333              | 0.25573        | 0.685 |
|                              |                        | Gay or Lesbian         | -0.14408              | 0.25516        | 0.942 |
| Work Engagement              | Asexual                | Bisexual               | -0.74051              | 0.73463        | 0.745 |
|                              |                        | Gay or Lesbian         | -0.87545              | 0.73261        | 0.631 |
|                              |                        | Pansexual              | -1.27431              | 0.87857        | 0.470 |
|                              | Bisexual               | Asexual                | 0.74051               | 0.73463        | 0.745 |
|                              |                        | Gay or Lesbian         | -0.13493              | 0.21733        | 0.925 |
|                              |                        | Pansexual              | -0.53379              | 0.53141        | 0.747 |
|                              | Gay or Lesbian         | Asexual                | 0.87545               | 0.73261        | 0.631 |
|                              |                        | Bisexual               | 0.13493               | 0.21733        | 0.925 |
|                              |                        | Pansexual              | -0.39886              | 0.52861        | 0.875 |
|                              | Pansexual              | Asexual                | 1.27431               | 0.87857        | 0.470 |
|                              |                        | Bisexual               | 0.53379               | 0.53141        | 0.747 |
|                              |                        | Gay or Lesbian         | 0.39886               | 0.52861        | 0.875 |
| Occupational Self-Efficacy   | Asexual                | Bisexual               | -0.79428              | 0.45551        | 0.304 |
|                              |                        | Gay or Lesbian         | -0.96884              | 0.45449        | 0.147 |
|                              |                        | Pansexual              | -0.68750              | 0.54491        | 0.588 |
|                              | Bisexual               | Asexual                | 0.79428               | 0.45551        | 0.304 |
|                              |                        | Gay or Lesbian         | -0.17456              | 0.13471        | 0.567 |
|                              |                        | Pansexual              | 0.10678               | 0.32942        | 0.988 |
|                              | Gay or Lesbian         | Asexual                | 0.96884               | 0.45449        | 0.147 |
|                              |                        | Bisexual               | 0.17456               | 0.13471        | 0.567 |
|                              |                        | Pansexual              | 0.28134               | 0.32800        | 0.827 |
|                              | Pansexual              | Asexual                | 0.68750               | 0.54491        | 0.588 |
|                              |                        | Bisexual               | -0.10678              | 0.32942        | 0.988 |
|                              |                        | Gay or Lesbian         | -0.28134              | 0.32800        | 0.827 |
| Work-related Quality of Life | Asexual                | Bisexual               | -0.68605              | 0.52989        | 0.567 |
|                              |                        | Gay or Lesbian         | -0.73656              | 0.52901        | 0.506 |
|                              |                        | Pansexual              | -0.87500              | 0.63440        | 0.514 |

|                |                |          |         |       |
|----------------|----------------|----------|---------|-------|
| Bisexual       | Asexual        | 0.68605  | 0.52989 | 0.567 |
|                | Gay or Lesbian | -0.05051 | 0.15498 | 0.988 |
|                | Pansexual      | -0.18895 | 0.38293 | 0.960 |
| Gay or Lesbian | Asexual        | 0.73656  | 0.52901 | 0.506 |
|                | Bisexual       | 0.05051  | 0.15498 | 0.988 |
|                | Pansexual      | -0.13844 | 0.38170 | 0.984 |
| Pansexual      | Asexual        | 0.87500  | 0.63440 | 0.514 |
|                | Bisexual       | 0.18895  | 0.38293 | 0.960 |
|                | Gay or Lesbian | 0.13844  | 0.38170 | 0.984 |

---

\* $p < 0.05$
